# Supplementary figures and images for: Pilot Investigation on p75ICD Expression in Laryngeal Squamous Cell Carcinoma
Source: MDPI journal article supplement (doi:10.3390/cancers14112622), 2022-05-25

Blot: Anti-p75 Cterminal Ab

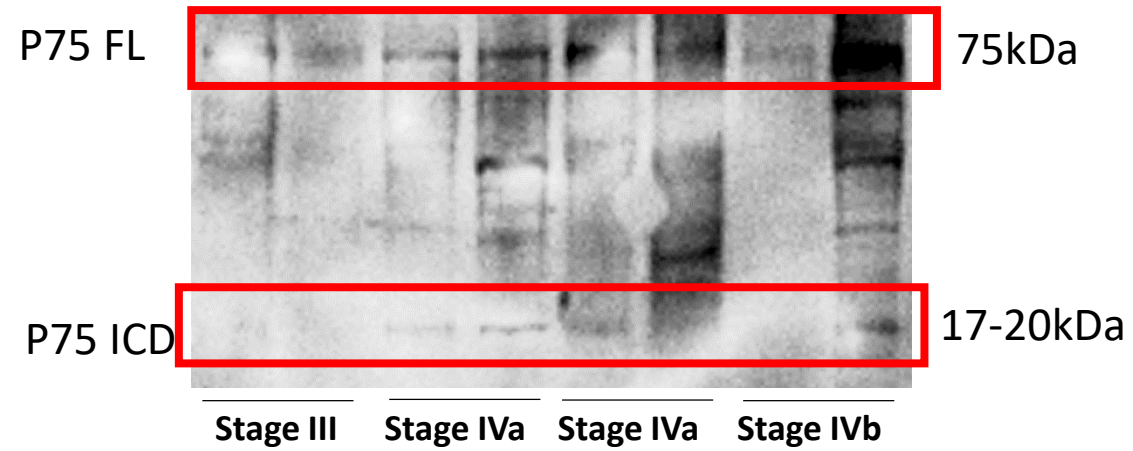

Blot: Anti-ABCG2 Ab

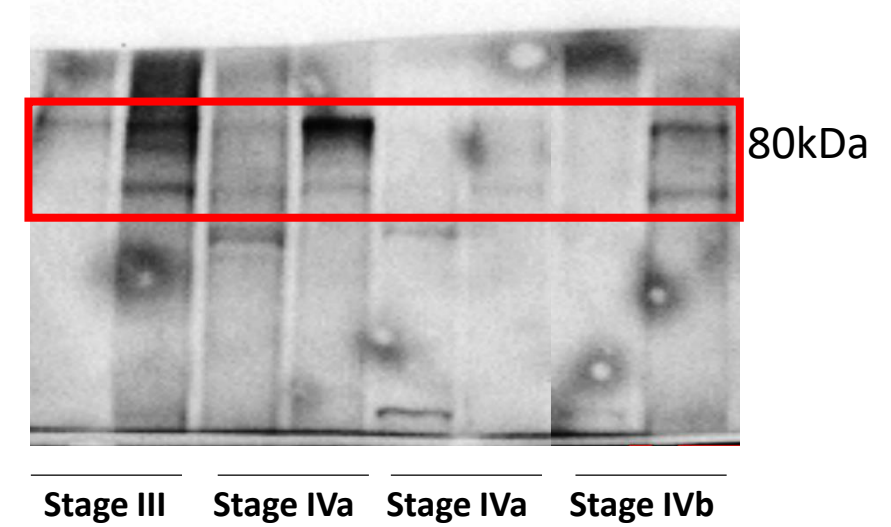

Blot: Anti-GAPDH Ab

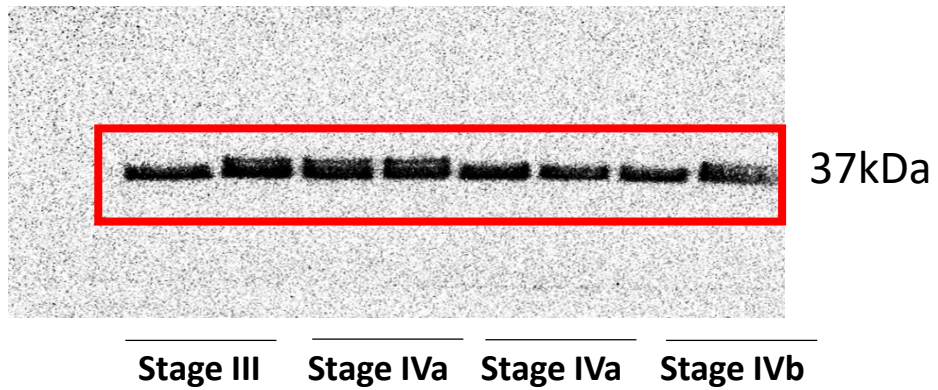

Supplement: s1 [file s1]
